# Supplementary material
Source: Springer Nature journal article supplement (https://www.springermedizin.de/resource/supplementary/13024_2013_521_MOESM7_ESM.pdf/9644394)
Supplement: MOESM7 [file 9644394]

Additional file 7

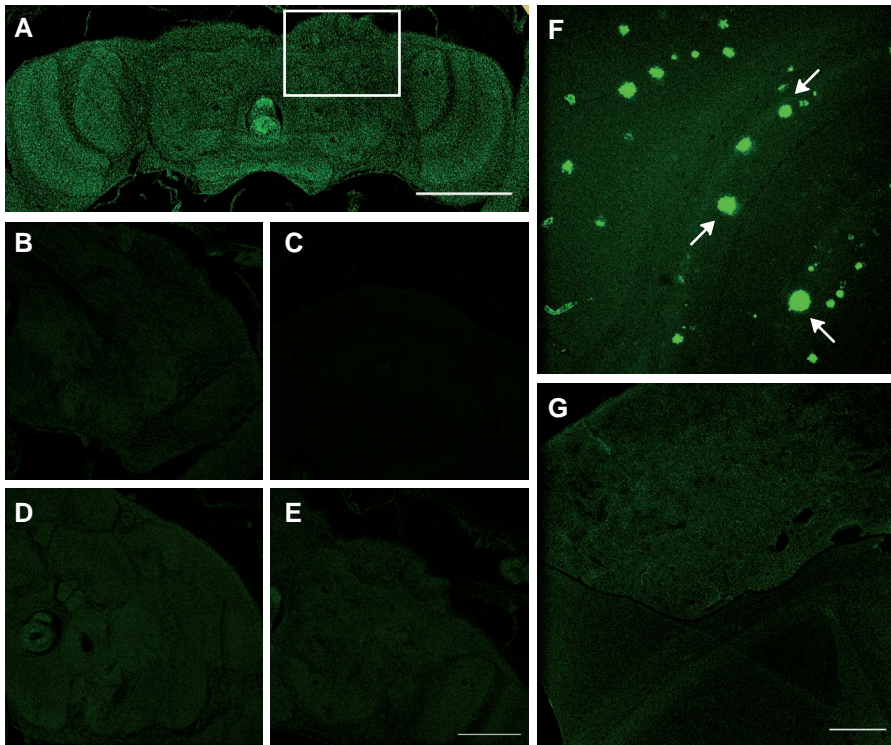

**Supp. Figure 5. Thioflavine S-negative accumulation of A $\beta$ 42, ABri and ADan in the CNS of *Drosophila*.** **A**, Whole brain section showing selected area (scale bar=100  $\mu$ m) and **B-E** brain sections of flies expressing two copies of BRI<sub>2</sub>-23, A $\beta$ 42, ABri and ADan respectively, did not show positive ThS staining (scale bar=50  $\mu$ m). **F**, Brain section from a 27 months-old Tg2576 mouse, used as a positive control, revealed ThS-positive amyloid plaques (arrows). **G**, brain section from an age-matched non-transgenic mouse littermate as a negative control (scale bar=200  $\mu$ m)
